# Supplementary material for: Spasmolytic Activity of Gentiana lutea L. Root Extracts on the Rat Ileum: Underlying Mechanisms of Action
Source: MDPI journal article supplement (doi:10.3390/plants13030453), 2024-02-04
Supplement: s1 [file s1]

# Spasmolytic Activity of *Gentiana lutea* L. Root Extracts on the Rat Ileum: Underlying Mechanisms of Action

Nemanja Kitić <sup>1,\*</sup>, Jelena Živković <sup>2</sup>, Katarina Šavikin <sup>2</sup>, Milica Randjelović <sup>3</sup>, Miloš Jovanović <sup>3</sup>, Dušanka Kitić <sup>3,\*</sup>, Bojana Miladinović <sup>3</sup>, Milica Milutinović <sup>3</sup>, Nenad Stojiljković <sup>4</sup> and Suzana Branković <sup>4</sup>

<sup>1</sup> Faculty of Medicine, University of Niš, Research Centre for Biomedicine, Ave. Dr. Zorana Đinđića 81, 18000, Niš, Serbia;

<sup>2</sup> Institute for Medicinal Plants Research “Dr. Josif Pančić”, Tadeuša Koščuška 1, 11000 Belgrade, Serbia; nemanja.kitic@medfak.ni.ac.rs (J.Ž.); ksavikin@mocbilja.rs (K.Š.)

<sup>3</sup> Faculty of Medicine, University of Niš, Department of Pharmacy, Ave. Dr. Zorana Đinđića 81, 18000, Niš, Serbia; milica.randjelovic@medfak.ni.ac.rs (M.R.); milos.jovanovic@medfak.ni.ac.rs (M.J.); bojana.miladinovic@medfak.ni.ac.rs (B.M.); milica.milutinovic@medfak.ni.ac.rs (M.M.)

<sup>4</sup> Faculty of Medicine, University of Niš, Department of Physiology, Ave. Dr. Zorana Đinđića 81, 18000, Niš, Serbia; nenstojiljkovic@gmail.com (N.S.); brankovic.suzana@yahoo.com (S.B.)

\* Correspondence: nemanja.kitic@medfak.ni.ac.rs (N.K.); dusanka.kitic@medfak.ni.ac.rs (D.K.)

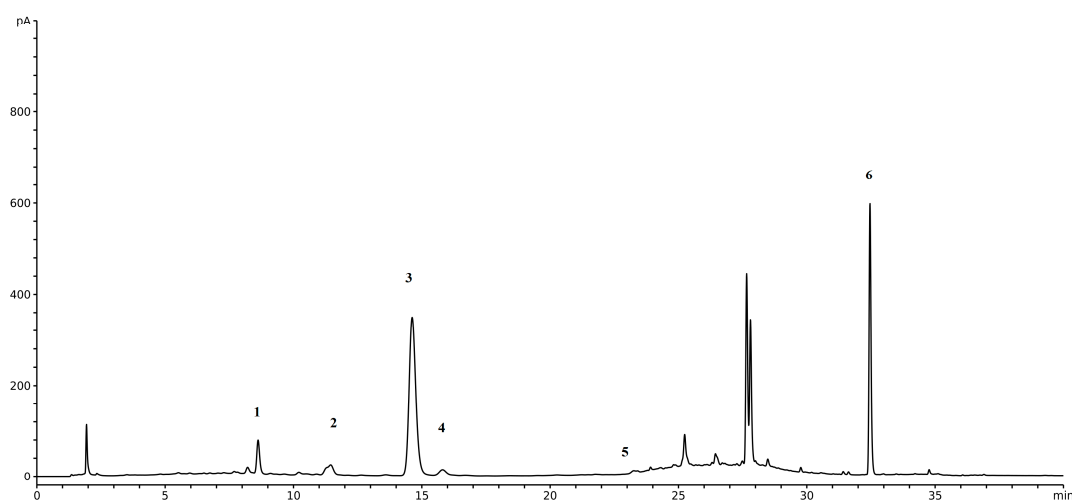

**Figure S1.** HPLC chromatogram of UAE recorded at 260 nm: 1 - loganic acid; 2 – swertiamarin; 3 – gentiopicroside; 4 – sweroside; 5 – isovitexin; 6 – isogentisin

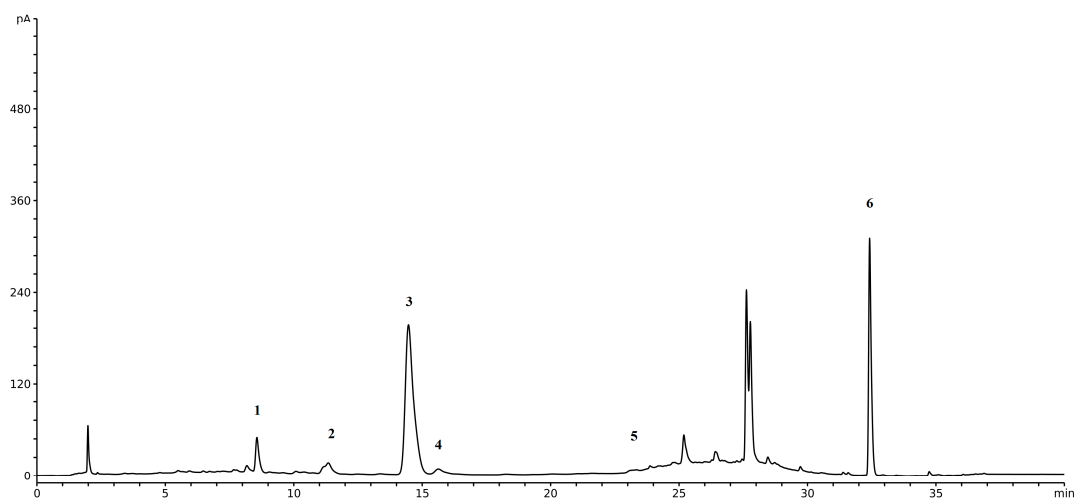

**Figure S2.** HPLC chromatogram of HAE recorded at 260 nm: 1 - loganic acid; 2 – swertiamarin; 3 – gentiopicroside; 4 – sweroside; 5 – isovitexin; 6 – isogentisin

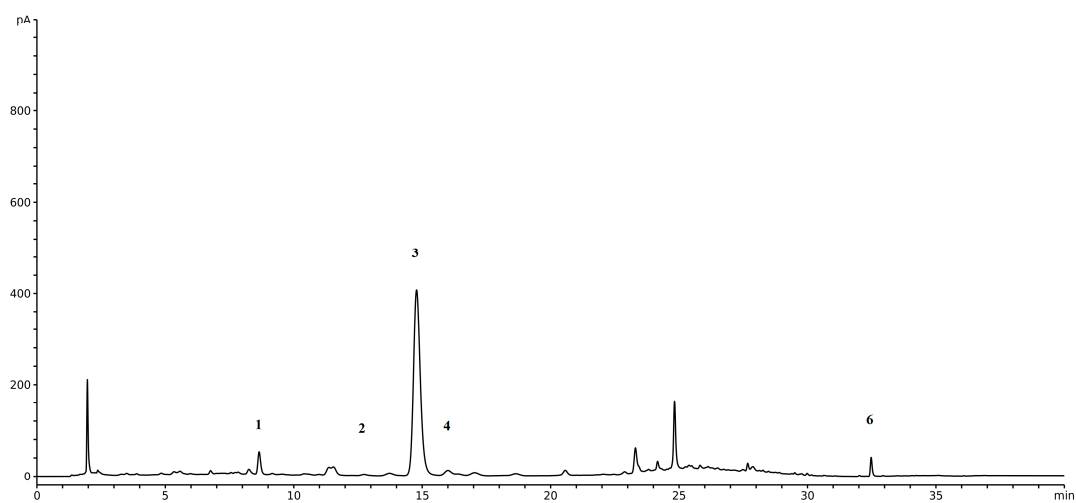

**Figure S3.** HPLC chromatogram of PE recorded at 260 nm: 1 - loganic acid; 2 – swertiamarin; 3 – gentiopicroside; 4 – sweroside; 5 – isovitexin; 6 – isogentisin

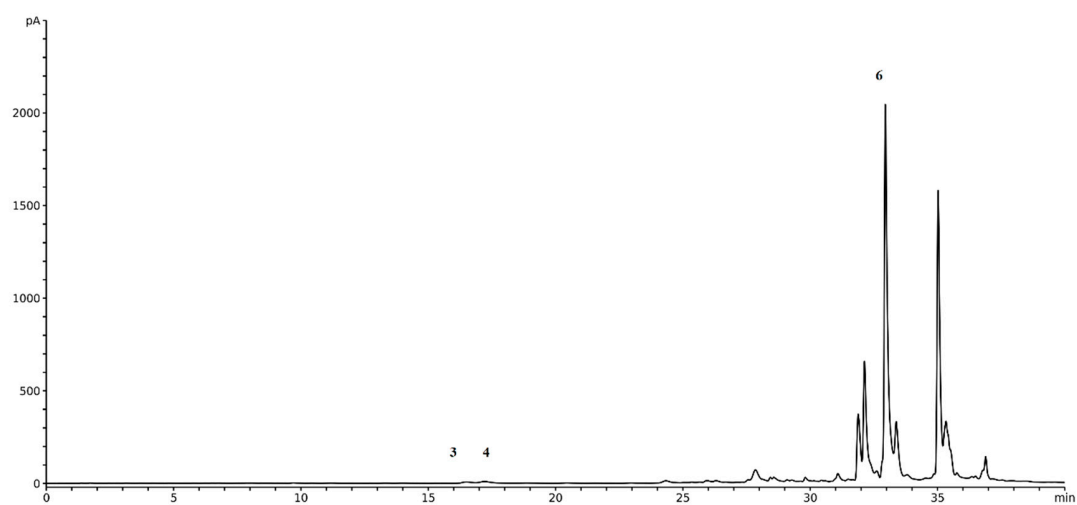

**Figure S4.** HPLC chromatogram of petroleum ether fraction recorded at 260 nm: 1 - loganic acid; 2 – swertiamarin; 3 – gentiopicric acid; 4 – sweroside; 5 – isovitexin; 6 – isogentisin

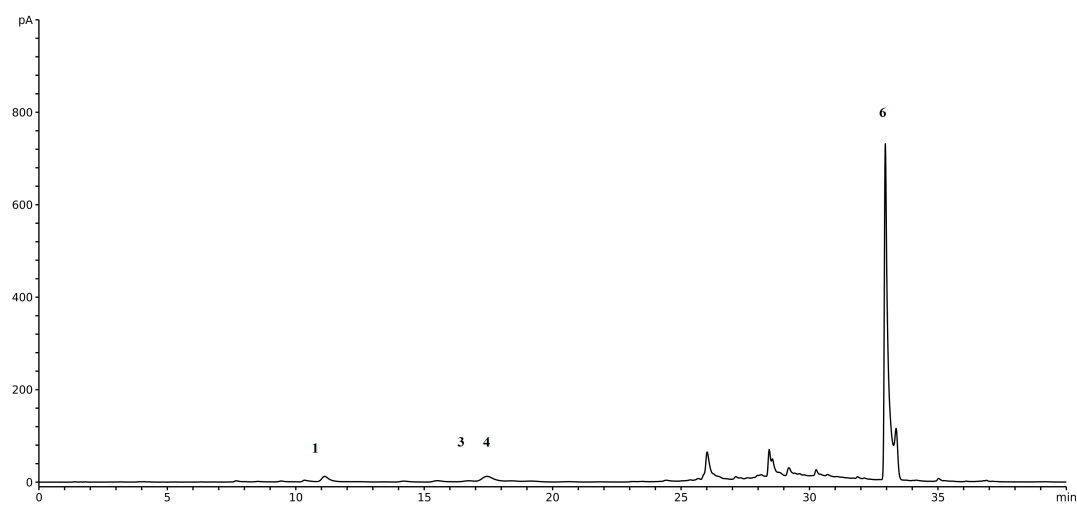

**Figure S5.** HPLC chromatogram of ethyl fraction recorded at 260 nm: 1 - loganic acid; 2 – swertiamarin; 3 – gentiopicric acid; 4 – sweroside; 5 – isovitexin; 6 – isogentisin

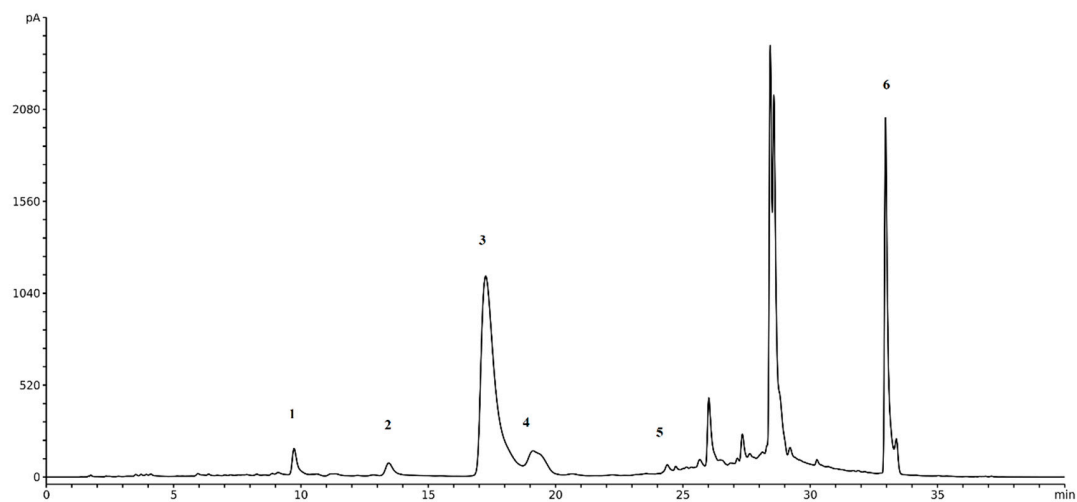

**Figure S6.** HPLC chromatogram of *n* - butanol recorded at 260 nm: 1 - loganic acid; 2 – swertiamarin; 3 – gentiopicroside; 4 – sweroside; 5 – isovitexin; 6 – isogentisin

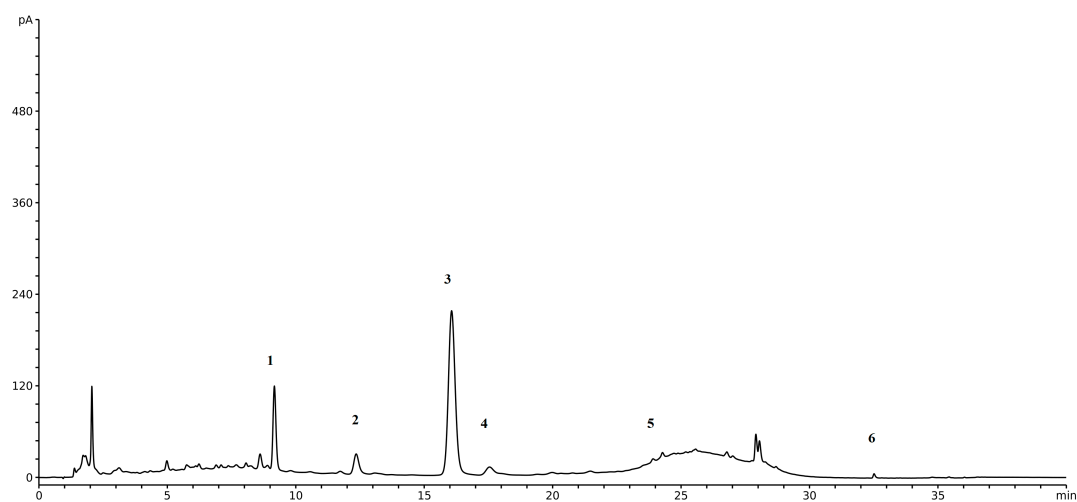

**Figure S7.** HPLC chromatogram of water fraction recorded at 260 nm: 1 - loganic acid; 2 – swertiamarin; 3 – gentiopicroside; 4 – sweroside; 5 – isovitexin; 6 – isogentisin

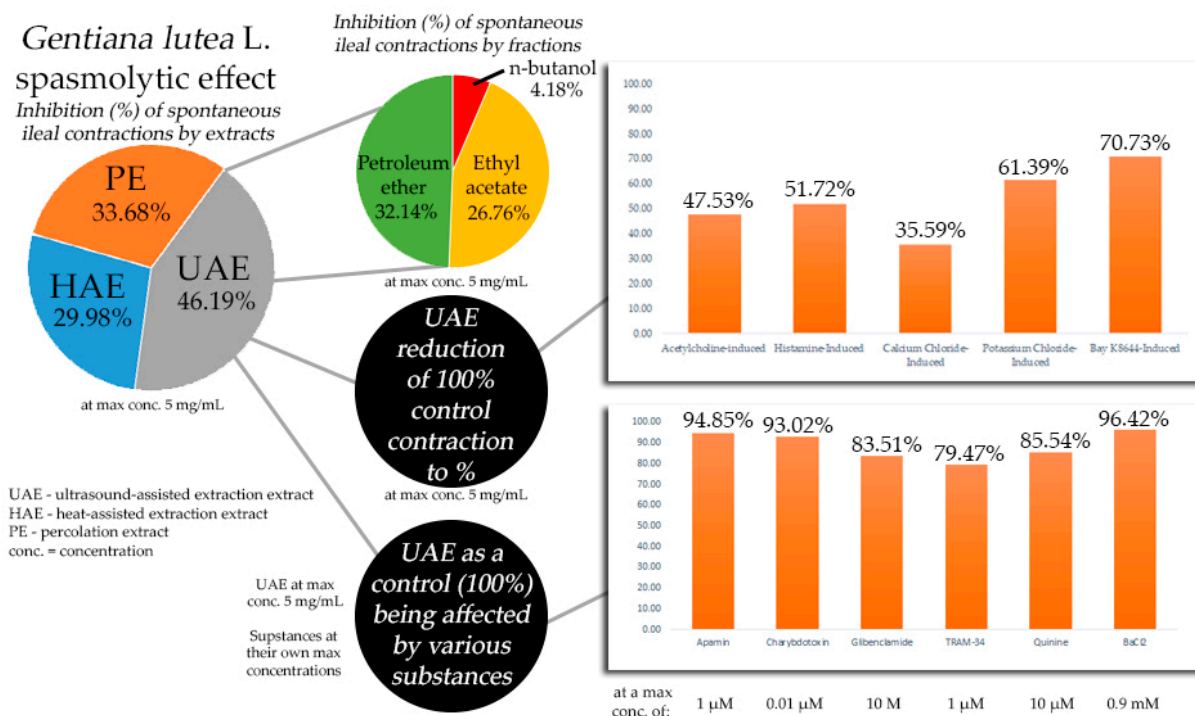

**Figure S8.** A graphical representation of the tested spasmolytic effects of *Gentiana lutea* L. root extracts
